1 **A dual sgRNA approach for functional genomics in *Arabidopsis***  
2 ***thaliana* [OPEN]**

3 **Running head: A dual sgRNA approach for Arabidopsis**

4

5 **Corresponding author:**

6 Laurens Pauwels

7 Department of Plant Systems Biology

8 VIB-Ghent University

9 Technologiepark 927

10 B-9052 Gent (Belgium)

11 Tel.: +32 9 3313851; Fax: +32 9 3313809; E-mail: [lapau@psb.ugent.be](mailto:lapau@psb.ugent.be)

12

13 **Subject areas:** (10) genomics, systems biology and evolution, and (11) new methodology.

14

15 This article includes: 6 color figures and 1 table.

16 Supplementary data includes four figures and one table and can be found with this article

17 online at <http://dx.doi.org/>.

18

19 **A dual sgRNA approach for functional genomics in *Arabidopsis thaliana*** [OPEN]

20

21 Laurens Pauwels<sup>1,2,\*</sup>, Rebecca De Clercq<sup>1,2</sup>, Jonas Goossens<sup>1,2</sup>, Sabrina Iñigo<sup>1,2</sup>, Clara  
22 Williams<sup>1,2</sup>, Mily Ron<sup>3</sup>, Anne Britt<sup>3</sup>, and Alain Goossens<sup>1,2</sup>

23 1. Ghent University, Department of Plant Biotechnology and Bioinformatics, 9052

24 Ghent, Belgium

25 2. VIB Center for Plant Systems Biology, 9052 Ghent, Belgium

26 3. UC Davis, Department of Plant Biology, Davis, CA 95616, US

27

28 **ORCID ID:** 0000-0002-0221-9052 (L.P.); 0000-0002-7940-2699 (J.G.); 0000-0001-5820-  
29 7109 (S.I.); 0000-0003-1292-6313 (C.W); 0000-0003-1682-7275 (M.R.); 0000-0002-1599-  
30 551X (A.G.).

31

32 \*Correspondence: [lapau@psb.ugent.be](mailto:lapau@psb.ugent.be)

33

34 **One-sentence summary:** We present a dual sgRNA approach to delete *Arabidopsis* gene  
35 fragments in order to obtain reliable functional knock-outs.

36

37

## 38 **Abstract**

39 Reverse genetics uses loss-of-function alleles to interrogate gene function. The advent of  
40 CRISPR/Cas9-based gene editing now allows to generate knock-out alleles for any gene and entire  
41 gene families. Even in the model plant *Arabidopsis thaliana*, gene editing is welcomed as T-DNA  
42 insertion lines do not always generate null alleles. Here, we show efficient generation of heritable  
43 mutations in *Arabidopsis* using CRISPR/Cas9 with a workload similar to generating overexpression  
44 lines. We obtain Cas9 null-segregants with bi-allelic mutations in the T2 generation. Out of seven new  
45 mutant alleles we report here, one allele for *GRXS17*, the ortholog of human GRX3/PICOT, did not  
46 phenocopy previously characterized nulls. Notwithstanding, the mutation caused a frameshift and  
47 triggered nonsense-mediated decay. We demonstrate that our workflow is also compatible with a dual  
48 sgRNA approach in which a gene is targeted by two sgRNAs simultaneously. This paired nuclease  
49 method can result in a more reliable loss-of-function alleles that lack a large essential part of the gene.  
50 The ease in the CRISPR/Cas9 workflow should help in the eventual generation of true null alleles of  
51 every gene in the *Arabidopsis* genome, which will advance both basic and applied plant research.

52 **Keywords:** *Arabidopsis thaliana*, genome engineering, genome editing, RNA-guided nuclease, PICOT,  
53 Fe–S cluster protein

54

55

56

57

## 58 INTRODUCTION

59

60 The precise introduction of a DNA double-strand break (DSB) in a plant genome can now be  
61 accomplished by a variety of techniques (Baltes and Voytas, 2015). However, the advent of  
62 Clustered Regularly Interspaced Short Palindromic Repeats/CRISPR associated  
63 (CRISPR/Cas9)-based technology has brought reliable gene editing (GE) within the reach of  
64 non-specialized molecular biology labs. The power of CRISPR/Cas9 compared to predecessor  
65 techniques lies in both its consistent high efficiency and its simple two-component design. A  
66 generic nuclease, Cas9, is guided to a target DNA sequence (protospacer) by associating with  
67 an artificial single guide RNA (sgRNA) (Jinek *et al.*, 2012). Changing the typically 20  
68 nucleotide long target-specific spacer sequence in the sgRNA is sufficient for redirecting the  
69 RNA-guided engineered nuclease to another genomic locus. In addition, several sgRNAs with  
70 different targets can be co-expressed allowing for multiplexing as exemplified in *Arabidopsis*  
71 *thaliana* by targeting of the PYRABACTIN RESISTANCE1-LIKE (PYL) family of abscisic  
72 acid receptor genes (Zhang *et al.*, 2016) or the GOLVEN family (Peterson *et al.*, 2016).

73 DSBs are readily recognized by the plant cell and repaired. When non-homologous end-  
74 joining (NHEJ) pathway results in imprecise repair, small insertions and deletions (indels) at  
75 the cut site are produced (Knoll *et al.*, 2014). In *Arabidopsis*, 1 base pair (bp) insertions (+1)  
76 are usually observed (Fauser *et al.* 2014, Feng *et al.*, 2014). The alternative NHEJ (aNHEJ)  
77 pathway uses a molecularly distinct mechanism and microhomologies flanking the cut site  
78 guide repair. Also known as microhomology-mediated end joining (MMEJ), it results in  
79 relatively larger deletions (Knoll *et al.*, 2014). NHEJ-mediated indel-formation is used to  
80 generate loss-of-function mutants. If the indel causes a frame-shift, a non-functional truncated  
81 protein can be translated and/or a premature stop codon will trigger nonsense-mediated decay  
82 (NMD) causing organized mRNA degradation by the cell (Popp and Maquat, 2016)

83 CRISPR/Cas9 technology has been established for *Arabidopsis* and is continuously being  
84 developed further (Feng *et al.* 2013, Mao *et al.* 2013, Fauser *et al.* 2014, Feng *et al.*, 2014, Ma  
85 *et al.*, 2015, Wang *et al.* 2015, Osakabe *et al.* 2016, Tsutsui and Higashiyama, 2016, Zhang *et*  
86 *al.*, 2016, Denbow *et al.*, 2017, Peterson *et al.*, 2016). Reports using CRISPR/Cas9 in  
87 *Arabidopsis* are emerging that are not technology-focused, but rather limited in number taking  
88 into account the widespread use of this model organism, the short generation time and its ease  
89 of transformation (Gao *et al.*, 2015, Ning *et al.*, 2015, Xin *et al.*, 2016, Zhang *et al.*, 2016,

90 Guseman *et al.*, 2017, Li *et al.*, 2017, Lu *et al.*, 2017, Ritter *et al.*, 2017). The difficulties of  
91 using CRISPR/Cas9 to generate mutants in Arabidopsis have been attributed to the unique  
92 floral dip system of transformation in which inflorescences of T0 plants are infected with  
93 *Agrobacterium tumefaciens*. Primary transformants (T1) are derived via this process from a  
94 transformed egg cell (Bechtold *et al.*, 2000). Chimerism, i.e. the presence of at least 3  
95 different alleles, points to Cas9 activity at later stages during somatic growth. This indicates  
96 that the mutation did not occur within the egg cell or zygote, but rather after the first cell  
97 division. Furthermore, even when mutations are detected in T1 somatic cells, often WT alleles  
98 are retrieved when the CRISPR/Cas9 T-DNA has been segregated away (Wang *et al.*, 2015).  
99 This can be attributed to gene editing efficiency, i.e. the percentage of cells not WT, as the  
100 limited amount of cells that make up the germ line have to be mutated for heritability.  
101 Here, we report and quantify high editing efficiencies in T1 somatic cells and inheritance of  
102 NHEJ-repaired alleles in Arabidopsis. Our workflow allows us to obtain Cas9 null-segregants  
103 with bi-allelic mutations in the T2 generation. Moreover, it is compatible with a dual sgRNA  
104 approach, leading to deletion of gene fragments and greater confidence in loss-of-function  
105 alleles.

106

107

108

## 109 **RESULTS**

### 110 ***High gene editing efficiency in T1 somatic tissue***

111 The vector pDE-Cas9 has successfully been used for gene editing (GE) in Arabidopsis  
112 (Fauser *et al.*, 2014). It contains an Arabidopsis codon-optimized SpCas9 sequence, driven by  
113 the *Petroselinum crispum* Ubiquitin4-2 promoter (pPcUBI). As kanamycin resistance is more  
114 often used in our lab both in Arabidopsis and in tomato, we used pDE-Cas9Km (Ritter *et al.*,  
115 2017) in which the basta resistance cassette in pDE-Cas9 is replaced with *nptII* (Figure S1). In  
116 order to evaluate these vectors, we initially designed nine sgRNAs targeting five genes of  
117 interest: *JASMONATE ASSOCIATED MYC2 LIKE 2* (*JAM2*, Sasaki-Sekimoto *et al.*, 2013),  
118 *VQ19* and *VQ33* (Jing and Lin, 2015), *HEMOGLOBIN 3* (*GLB3*) and *GLUTAREDOXIN S17*  
119 (*GRXS17*) (Nagels Durand *et al.*, 2016). sgRNAs were designed to minimize possible off-  
120 target activity (Lei *et al.*, 2014), and when possible predicted sgRNA efficiencies were taken  
121 into account (Chari *et al.*, 2015). An updated overview of estimated sgRNA parameters by  
122 CRISP-OR (<http://crispor.tefor.net/>, Haeussler *et al.*, 2016) can be found in Table 1. Although  
123 it is currently unknown if the models for sgRNA efficiency, based on empirical data from  
124 metazoan cells holds true in plants, we anticipate that at least some sgRNA sequence  
125 parameters will be the similar as CRISPR/Cas9 is a fully heterologous system. Preferably  
126 sgRNAs were chosen in the 5' end of the first exon (Figure 1). In the case of *JAM2*, we  
127 specifically designed two sgRNAs that targeted the sequence encoding the JAZ interaction  
128 domain (JID) (Fernandez-Calvo *et al.*, 2009).

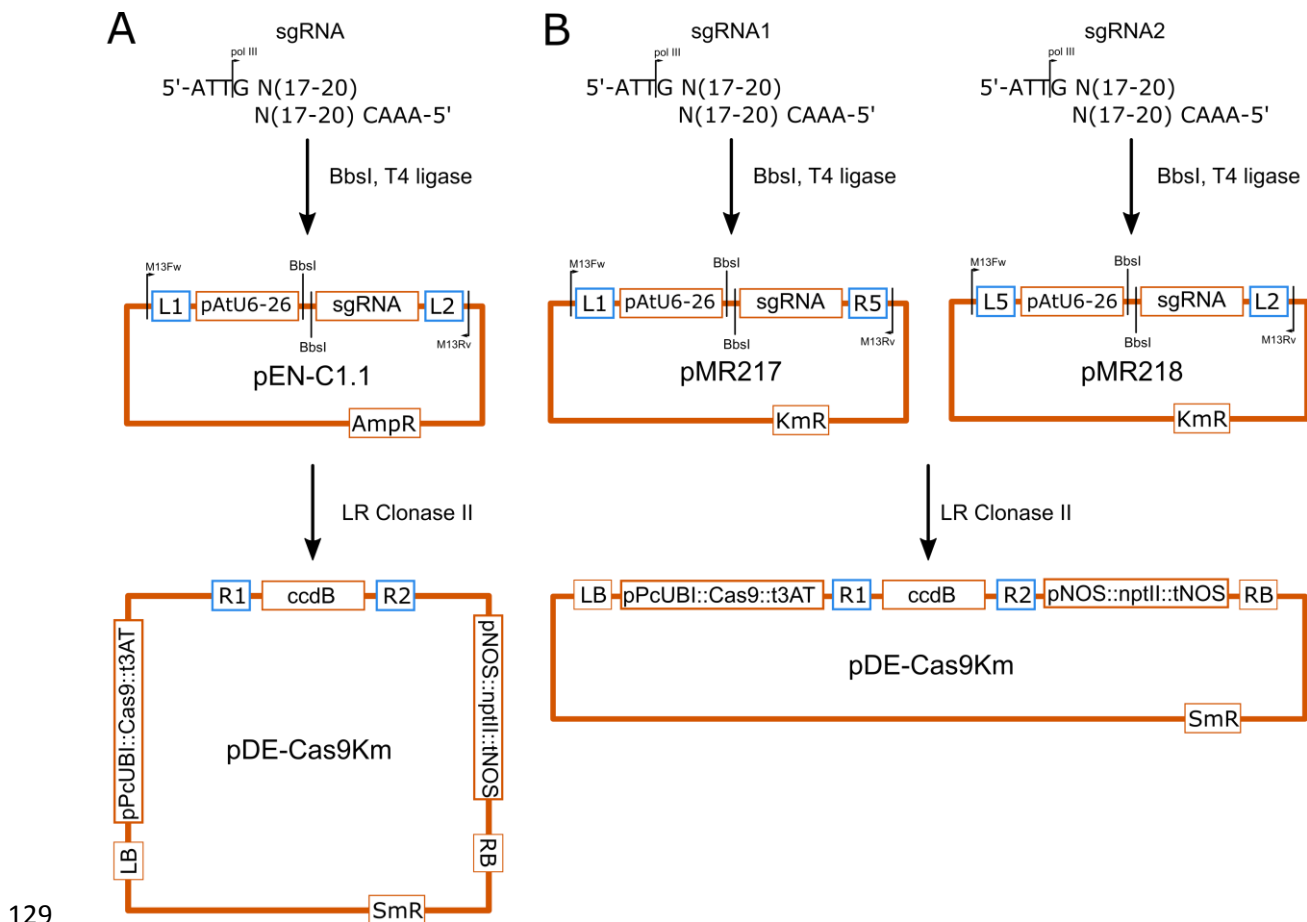

129

130 **Figure S1. Cloning procedures and vector maps.** A, procedure for cloning one sgRNA according to Fauser *et*  
 131 *al.*, 2014. Two oligonucleotides are synthesized that have 4-bp overhangs for Type-IIIS cloning and contain a  
 132 guide sequence of 17 to 20 nucleotides. The annealed oligos are cloned in the pEN-C1.1 shuttle vector that  
 133 contain the Arabidopsis U6-26 promoter driving the sgRNA. The G of the 5' ATTG overhang is the first  
 134 transcribed base by the RNA polymerase III. After sequence verification, the vectors are recombined with the  
 135 pDE-Cas9Km destination vector that contains the Cas9 (codon optimized for *Arabidopsis thaliana*) under  
 136 control of the *Petroselinum crispum* ubiquitin4-2 promoter (pPcUBI) and the *nptII* selection marker for plants  
 137 B, dual sgRNA cloning. The pMR217 or pMR218 shuttle vectors used are identical, except for the MultiSite  
 138 Gateway recombination sites (in blue). AmpR, KmR and SmR are ampicillin, kanamycin and streptomycin  
 139 resistance markers for *Escherichia coli*.

140

141 The sgRNA cloning procedure (Figure S1A) uses the type II restriction enzyme BbsI and  
 142 utilizes a 5' ATTG overhang of which the G serves as the first nucleotide of the sgRNA when  
 143 transcribed by the polymerase III promoter AtU6-26. Most sgRNAs were of the GN19-type  
 144 with the 5' G being the first transcribed base of a 20-bp long guide sequence. One sgRNA,  
 145 JAM2-140, was of the GN20-type. An extra 5' G or GG attached to the sgRNA should not  
 146 hinder efficiency (Cho *et al.*, 2014). Another sgRNA VQ33-42, was a GN18-type. Truncated

147 sgRNAs (tru-gRNAs) down to a 17bp guide sequence have been shown to be as efficient as  
148 20bp guides in human cells (Fu *et al.*, 2014).  
149 For each single sgRNA construct, approximately 15 T1 Arabidopsis plants were selected on  
150 basta or kanamycin respectively. One of the first true leaves was harvested for genomic DNA  
151 extraction. A region spanning the predicted cut site was amplified by PCR and the amplicon  
152 sequenced by traditional Sanger sequencing. Arabidopsis CRISPR/Cas9 T1 plants are  
153 typically chimeric, defined as having at least three different alleles for a locus (Feng *et al.*,  
154 2014). Different cell files showed different indels in both alleles after NHEJ-mediated repair,  
155 leading to a range of detectable indels in a single leaf and a complex chromatogram. The  
156 quantitative sequence trace data was therefore decomposed using the Tracking of Indels by  
157 DEcomposition (TIDE) software (<https://tide.nki.nl/>) (Brinkman *et al.*, 2014). This results in  
158 an estimation of overall editing efficiency (percentage of cells not WT) and the spectrum and  
159 frequency of the dominant indel types (See Figure 1B for an example for *GLB3*). Subcloning  
160 of amplicons followed by sequencing yielded similar profiles (Figure 1C). Furthermore,  
161 examination of genomic DNA of different leaves yielded comparable but not identical  
162 patterns (Figure S2).  
163



164

165

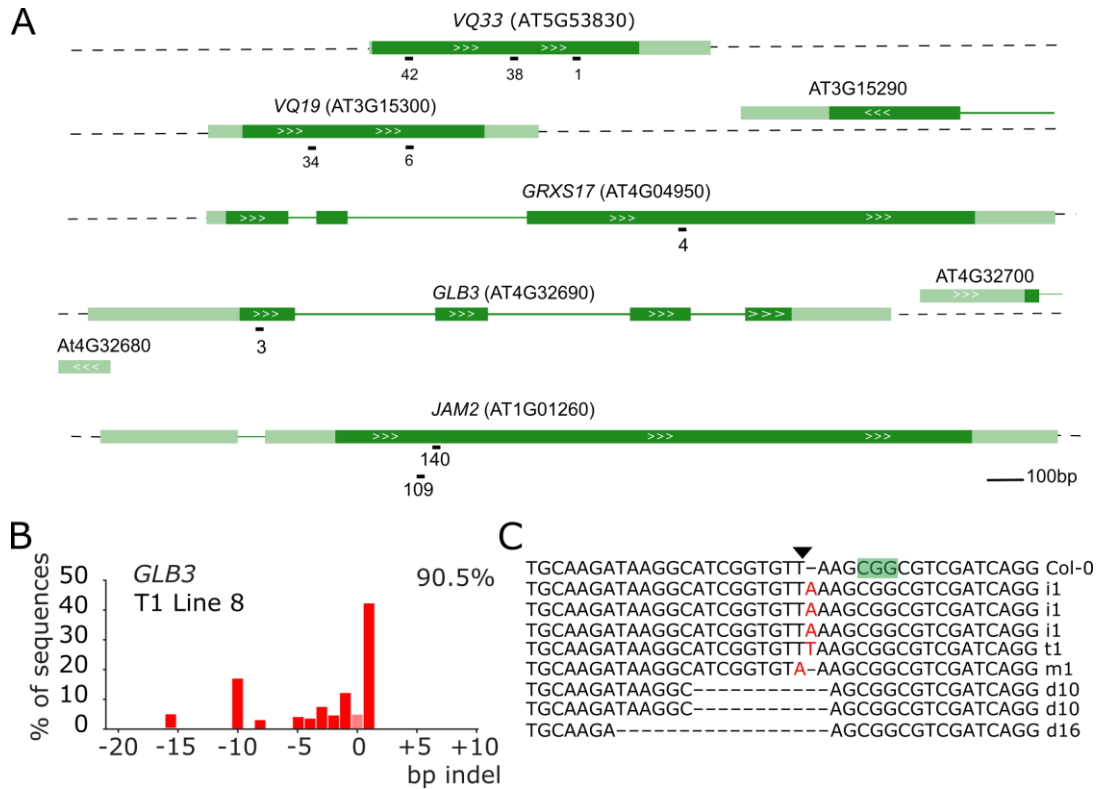

166

167 **Figure 1. Use of TIDE to analyze CRISPR/Cas9-induced somatic mutations in T1 Arabidopsis plants.** A,

168 genomic structure of the targeted genes and location of the sgRNAs. Dark green boxes designate exons; light

169 green boxes, UTRs; solid lines, introns; white arrows gene orientation. sgRNA numbers are arbitrary identifiers.

170 B, example result of a TIDE analysis. A leaf of a T1 plant expressing a CRISPR/Cas9 construct targeting *GLB3*

171 was used to prepare genomic DNA. The targeted region was amplified by PCR and sequenced using standard

172 Sanger sequencing. TIDE software was used to visualize the indel spectrum and estimate overall editing

173 efficiency (top right corner). Bars indicate the number of sequences with a given indel size. Pink bar (indel size

174 of zero) represents WT or base substitution alleles. C, Verification of TIDE using sequencing of individual

175 amplicon subclones. The PAM is highlighted in green, the triangle points to the Cas9 cut site. I, insertion, d,

176 deletion, m, mutation are followed with the number of bases involved.

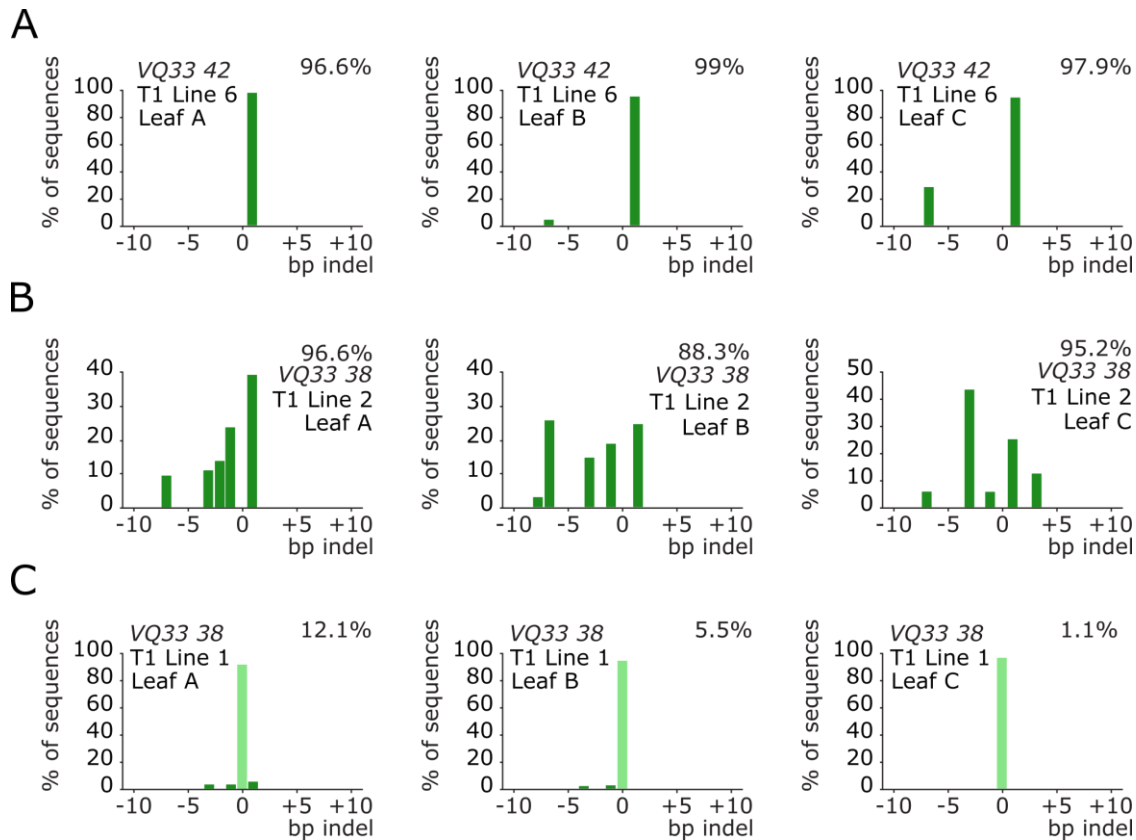

177

178 **Figure S2. Comparison of TIDE spectra between leaves of the same T1 plant.** Three true leaves (A, B and  
179 C) of a T1 plant were sampled. Genomic DNA was extracted, PCR amplified and sequenced. The indel spectrum  
180 is visualized with an estimated overall efficiency and the frequency of each indel using TIDE. Bars indicate the  
181 number of sequences with a given indel size. Pale green bars (indel size of zero) represents WT or base  
182 substitution alleles. A, example of a highly efficient edited T1 plant with low chimerism. B, example of a highly  
183 efficient edited T1 plant with high chimerism. C, example of a T1 plant with low editing efficiency.

184

185

186

187

188 All but one sgRNA had high editing efficiencies with the median efficiency being higher than  
189 80% (Figure 2A). Notably, VQ33-38, the sgRNA predicted by all three algorithms to have the  
190 worst efficiency (Table S2) had one of the highest efficiencies *in planta*. Next, we used the  
191 data generated, to investigate chimerism in the T1 plants. The most frequently observed  
192 mutation is a 1 bp insertion, followed by deletions of increasing size (Figure 2B). Large  
193 insertions were very uncommon. However, depending on the sgRNA larger deletions of a  
194 particular size were often observed. Potentially this is related to MMEJ, whereby regions of  $\geq$   
195 3 bp microhomology help initiate polymerase  $\Theta$  repair by annealing of single-stranded DNA  
196 overhangs (Black *et al.*, 2013, Shen *et al.*, 2017). In summary, we show high rates of  
197 CRISPR/Cas9 mutagenesis in Arabidopsis T1 somatic tissue for most tested sgRNAs and that  
198 TIDE is a robust method to evaluate sgRNA efficiency.

### 199 ***Inheritance of mutations to T2***

200 Focusing on *GLB3*, we investigated the heritability of these after selfing and selected for T2  
201 progeny that had lost the T-DNA (Cas9 null-segregants). First, we identified three T1 lines  
202 with a single T-DNA locus by segregation analysis of the kanamycin resistance marker in T2  
203 seedlings. Of these three lines we germinated 14 to 17 seedlings on soil, prepared genomic  
204 DNA and genotyped using Cas9 specific primers to identify null-segregants (Figure 3A). The  
205 genomic DNA of these plants was re-used to amplify the target site and sequencing data was  
206 analyzed using TIDE to identify genotypes at the target locus. All 15 tested null-segregants  
207 were found to be non-chimeric: 8 were WT, 5 heterozygous and 2 were homozygous. Hence,  
208 inherited mutations were present in the T2 progeny of all three independent T1 lines.  
209 Although we only detected the desired homo-allelic Cas9 null-segregants in the progeny of  
210 one T1 line, heterozygous alleles will lead to the desired genotypes in the next generation.  
211 An outcome also overrepresented in T1 somatic mutations for *GLB3*, and frequently observed  
212 in the inherited mutations from independent events was a 10 bp deletion (Figure 3B). Lastly,  
213 we identified a heritable T to A substitution which led to a single nucleotide variation (SNV)  
214 and here results in a premature stop codon (Figure 3B and 3C). This occurs when a single bp  
215 deletion is followed by a single bp insertion, an event very rarely observed for CRISPR/Cas9  
216 (Kim *et al.*, 2017). In conclusion, the pDE-Cas9 vectors allow for efficient and inheritable  
217 genome editing in Arabidopsis with the possibility of producing transgene free homo-allelic  
218 mutants in the T2 generation.

219

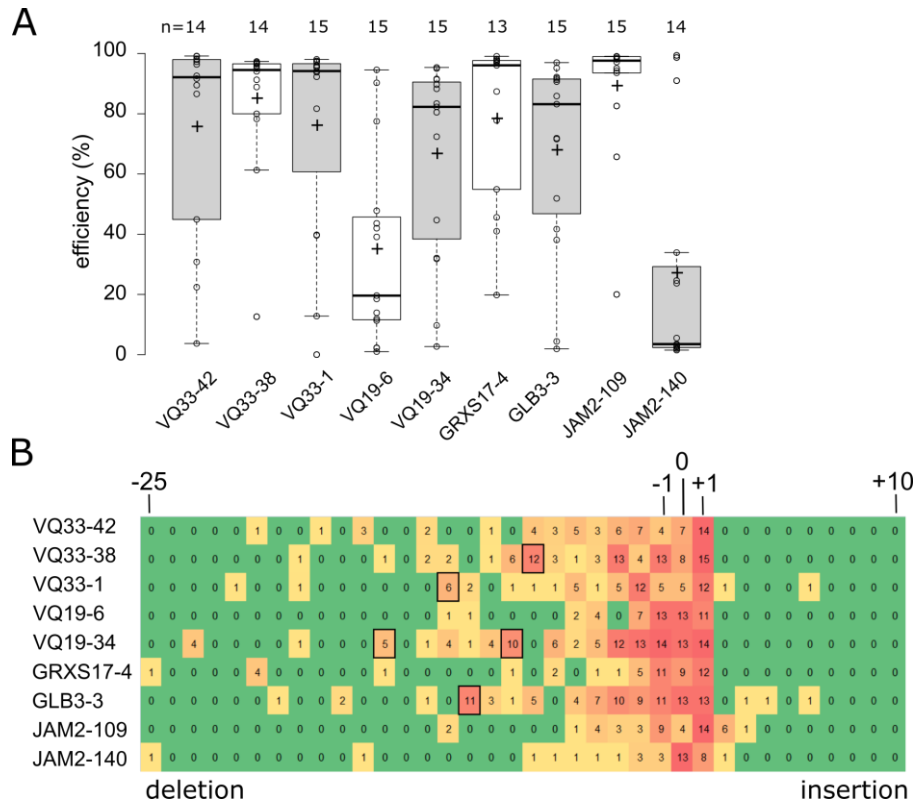

220

221 **Figure 2. High gene editing efficiency in Arabidopsis T1 generation.** A, boxplots showing TIDE estimated  
 222 editing efficiencies for up to 15 T1 plants for nine different sgRNAs. +, mean; horizontal line, median; open  
 223 circles, individual data points. B, heat map showing the number of T1 plants with at least 1% estimated  
 224 frequency of an indel of a given size. Boxed are larger deletions observed in multiple T1 plants.

225

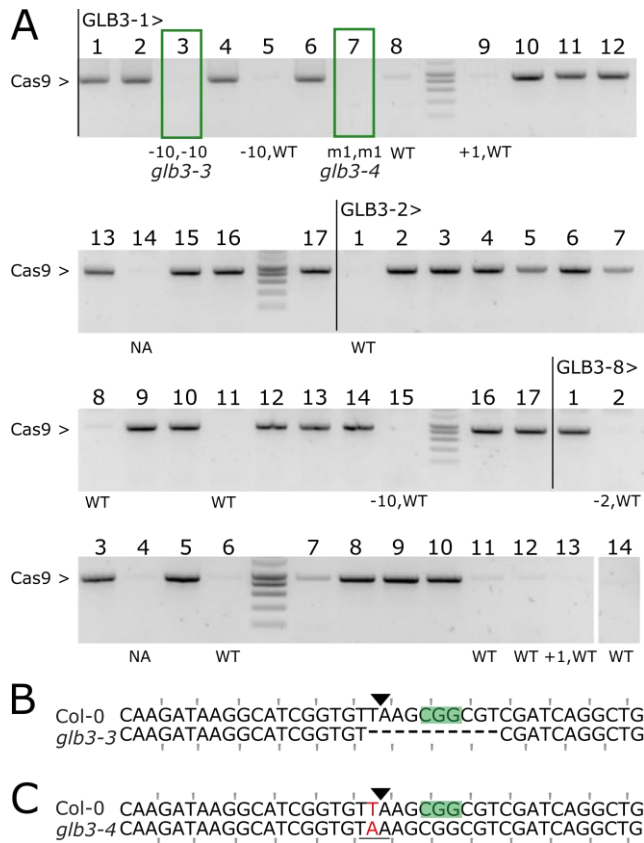

226

227 **Figure 3. Inheritance of CRISPR/Cas9 mutations.** A, PCR amplification of the Cas9 transgene in T2  
 228 seedlings from 3 independent GLB3 lines: -1, -2 and -8. Genotypes for all null-segregants were estimated using  
 229 TIDE. NA, not assayed; WT, wild-type; m1, 1bp substitution. Boxed plants were continued. B-C, Sequence  
 230 alignment of the targeted locus for Col-0 and *glb3-3* (B, Line 1, plant 3) or *glb3-4* (C, Line 1, plant 7). PAM is  
 231 highlighted, the Cas9 cut site indicated with a triangle. Mutated bases are in red, deleted bases replaced by an  
 232 endash. The reading frame is marked.

233

234

235

236

237

238

239

240

241

242

243

244

245

**Table 1. sgRNA parameters used in this study**

| Name       | Type <sup>1</sup> |       | Protospacer + PAM        | Specificity <sup>2</sup> | Chari <sup>3</sup> | Doench <sup>4</sup> | Mor.-Mateos <sup>5</sup> | Observed efficiency <sup>6</sup> | Efficiency median <sup>7</sup> | Chimerism <sup>8</sup> |
|------------|-------------------|-------|--------------------------|--------------------------|--------------------|---------------------|--------------------------|----------------------------------|--------------------------------|------------------------|
| VQ33-42    | trugRNA           | G-N18 | GATGAGGAGATATTATCTG AGG  | 95                       | 79                 | 72                  | 57                       | 75,0                             | 92,2                           | 5,4                    |
| VQ33-38    | starts with G     | G-N19 | GCCTTAACGTATTGATCATT AGG | 96                       | 2                  | 36                  | 28                       | 84,4                             | 94,6                           | 5,9                    |
| VQ33-1     | starts with G     | G-N19 | GGGTCATCGTTGCTTCTCAG TGG | 100                      | 58                 | 66                  | 56                       | 75,4                             | 94,2                           | 4,5                    |
| VQ19-6     | starts with G     | G-N19 | GGGACTGTTAAGTGCAAGCT TGG | 99                       | 28                 | 48                  | 45                       | 34,4                             | 19,6                           | 3,5                    |
| VQ19-34    | starts with G     | G-N19 | GCGGAGAGTCTGGAGATCTT GGG | 99                       | 60                 | 44                  | 50                       | 66,1                             | 82,3                           | 7,6                    |
| GRXS17-4   | starts with G     | G-N19 | GACCTTCGAGCCGAGCTCGG AGG | 100                      | 99                 | 64                  | 58                       | 67,3                             | 83,2                           | 4,2                    |
| GLB3-3     | starts with G     | G-N19 | GATAAGGCATCGGTGTTAAG CGG | 100                      | 88                 | 62                  | 56                       | 77,7                             | 96,1                           | 6,6                    |
| JAM2-109   | starts with G     | G-N19 | GGAGATTTGGTTCTCTGTTG GGG | 97                       | 31                 | 48                  | 53                       | 88,6                             | 97,7                           | 3,4                    |
| JAM2-140   | extra G           | G-N20 | TATTGCAGAGAGCCTAAAGA AGG | 96                       | 80                 | 56                  | 36                       | 26,4                             | 4,5                            | 2,5                    |
| GRXS17-133 | extra G           | G-N20 | CTTGATAACTTGCCCAGAG CGG  | 84                       | 86                 | 62                  | 57                       | NA                               | NA                             | NA                     |
| GRXS17-67  | extra G           | G-N20 | ATTATGGAGCTAAGTGAGAG TGG | 98                       | 87                 | 63                  | 28                       | NA                               | NA                             | NA                     |
| WRKY20-201 | extra G           | G-N20 | ACTTCCCAAAATGACTCCAG AGG | 100                      | 97                 | 69                  | 64                       | NA                               | NA                             | NA                     |
| WRKY20-39  | starts with G     | G-N19 | GTATGGCTGCACAAGAAGAA AGG | 96                       | 90                 | 54                  | 42                       | NA                               | NA                             | NA                     |

<sup>1</sup>, type of sgRNA depending on the position of the starting guanine nucleotide. <sup>2</sup>, CRISPOR specificity score (0-100). <sup>3</sup>, predicted efficiency score (0-100) by Chari *et al.*, 2016. <sup>4</sup>, predicted efficiency score (0-100) by Doench *et al.*, 2016. <sup>5</sup>, predicted efficiency score (0-100) by Moreno-Mateos *et al.*, 2015. <sup>6</sup>, observed efficiency as the average efficiency indicated by TIDE T1 seedlings. <sup>7</sup>, median efficiency indicated by TIDE T1 seedlings. <sup>8</sup>, chimerism indicated as the average number of alleles present  $\geq 1\%$  in a T1 plant.

246

247

248 ***Isolation of a new grxs17 CRISPR allele***

249 Previously we characterized in detail two independent knock-out alleles of *GRXS17*, a gene  
250 encoding a component of the FeS cluster assembly pathway (Iñigo *et al.*, 2016). The allele  
251 *grxs17-1* (SALK\_021301) contains a T-DNA in the second exon (Figure 4A), whereas the  
252 *grxs17-2* allele expresses an antisense construct (Cheng *et al.*, 2011).

253 A T1 parental line described above that showed high editing efficiency (97.3%) in somatic  
254 tissue and had a single T-DNA locus was identified (Figure 4B). Two Cas9 null-segregants of  
255 the T2 progeny were genotyped using TIDE (Figure 4C). This yielded the *grxs17-3* allele that  
256 was predicted to have a (-8,-8) genotype. Inspection of the sequence in T3 plants revealed an  
257 additional 4 bases mutated, nevertheless leading to loss of the reading frame (Figure 4D).  
258 Using RT-qPCR, we could observe strong downregulation (~80%) of the entire *GRXS17*  
259 transcript (Figure 4E). This is probably the result of nonsense-mediated decay (NMD), a  
260 process triggering mRNA degradation in case a premature stop codon is present (Popp and  
261 Maquat, 2016). However, as there is no exon-exon boundary 3' of the premature stop codon,  
262 this can be a case of exon-junction complex (EJC)-independent NMD, wherein NMD is  
263 triggered by a long 3' UTR (Fatscher *et al.*, 2014). Remarkably, the elongated leaf  
264 developmental phenotype present in both *grxs17-1* and *grxs17-2* was not visible in *grxs17-3*  
265 (Figure 4F). *GRXS7* is a multidomain protein with an N-terminal thioredoxin (TRX) domain  
266 followed by three glutaredoxin (GRX) domains (Figure 4A). The human GRX3 ortholog has  
267 only 2 GRX domains, whereas the yeast Grx3/Grx4 orthologs have only one GRX domain  
268 (Couturier *et al.*, 2014). We hypothesize that the *grxs17-3* allele is not a null allele and  
269 possibly expresses a C-terminally truncated *GRXS17* protein with a functional TRX and GRX  
270 domain.

271

272

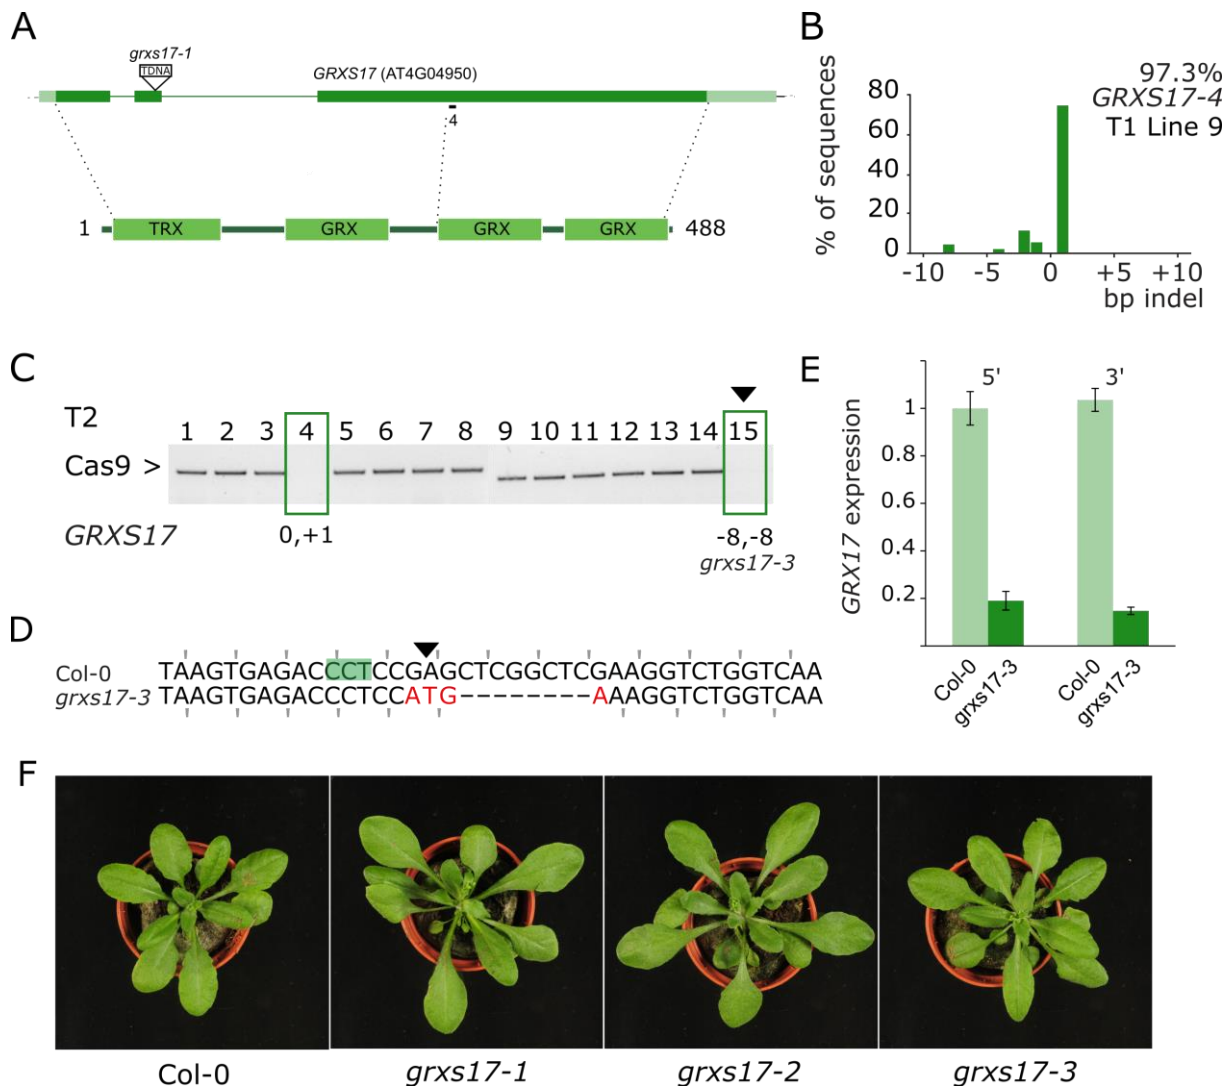

273

274 **Figure 4. *grxs17-3* does not show a *grxs17-1* phenotype.** A, Gene and protein structure of GRXS17. The  
 275 location of the *grxs17-1* T-DNA insertion is indicated and the sgRNAs used in this study. Dark green boxes  
 276 designate exons; light green boxes, UTRs; solid lines, introns. TRX, thioredoxin domain; GRX, glutaredoxin  
 277 domain. B, TIDE analysis of T1 line 9. Genomic DNA was PCR amplified and sequenced. The indel spectrum  
 278 is visualized with an estimated overall efficiency and the frequency of each indel. C, PCR amplification of the  
 279 Cas9 transgene. Null-segregants are boxed and the continued plant marked with a triangle. TIDE estimated  
 280 genotypes for GRXS17 are given for the null segregants. D, Sequence alignment of the targeted locus for Col-0  
 281 and *grxs17-3* (Line 9, plant 15). PAM is highlighted, the Cas9 cut site indicated with a triangle. Mutated bases  
 282 are in red, deleted bases replaced by an en dash. The reading frame is marked. E, GRXS17 gene expression  
 283 analyzed by RT-qPCR. Expression relative to Col-0 is plotted using primers annealing both at the 5' and the 3' of  
 284 the transcript and the mutation. F, rosette phenotypes of Col-0, the T-DNA insertion line *grxs17-1*, the antisense  
 285 line *grxs17-2* and the *grxs17-3* CRISPR allele.  
 286

## 287 **A dual sgRNA approach for gene deletions**

288 Choice of the sgRNA target site is pivotal to generate a reliable knock-out. Genes can contain  
 289 alternative start codons, have alternative first exon usage, exon skipping and/or C-terminally  
 290 truncated proteins and therefore might still be partially functional as exemplified above. In-  
 291 depth knowledge on the gene structure, transcript and protein is therefore advisable. However,



292 in many cases this information is not complete. Therefore, we examined in Arabidopsis a dual  
293 sgRNA approach in which two sgRNAs target the same gene to remove a large part (Chen *et*  
294 *al.*, 2014, Zhang *et al.*, 2016, Ordon *et al.*, 2017).

295 Using a MultiSite Gateway based sgRNA multiplexing approach we previously described  
296 (Ritter *et al.*, 2017) we co-expressed two sgRNAs in pDE-Cas9Km. We used this method to  
297 target the gene encoding the transcription factor WRKY20, which is closely related to  
298 WRKY2, with two sgRNAs. For the latter, a characterized T-DNA insertion mutant *wrky2-1*  
299 is available representing a strong loss-of-function or null allele (Ueda *et al.*, 2011). We  
300 transformed the *wrky2-1* background with a dual sgRNA construct for *WRKY20*, predicted to  
301 remove a 247 bp fragment encoding the first WRKY protein domain in addition to putting the  
302 remainder of the sequence out of frame (Figure 5A). Without any phenotypic selection, we  
303 applied the same workflow as before. We selected four independent T1 lines showing high  
304 levels of the expected deletion and containing a single T-DNA locus (Figure 5B). For each  
305 line, one or more null-segregants were identified in T2 (Figure 5C) and genotyped for the  
306 *WRKY20* locus. Of seven Cas9 null-segregants successfully genotyped, two plants were  
307 homozygous for the expected deletion, three heterozygous and two wild-type (Figure 5D).  
308 Sequence analysis of two homozygous deletion mutants showed that *wrky2-1 wrky20-1* (plant  
309 A15-8) had the predicted 247 bp deletion, whereas the other allele *wrky2-1 wrky20-2* (plant  
310 B2-5 ) had only 246 bp deleted, possibly restoring the reading frame (Figure 5E). This shows  
311 that a dual sgRNA approach for deleting gene fragments is feasible with relatively few  
312 numbers of genotyped plants.

313

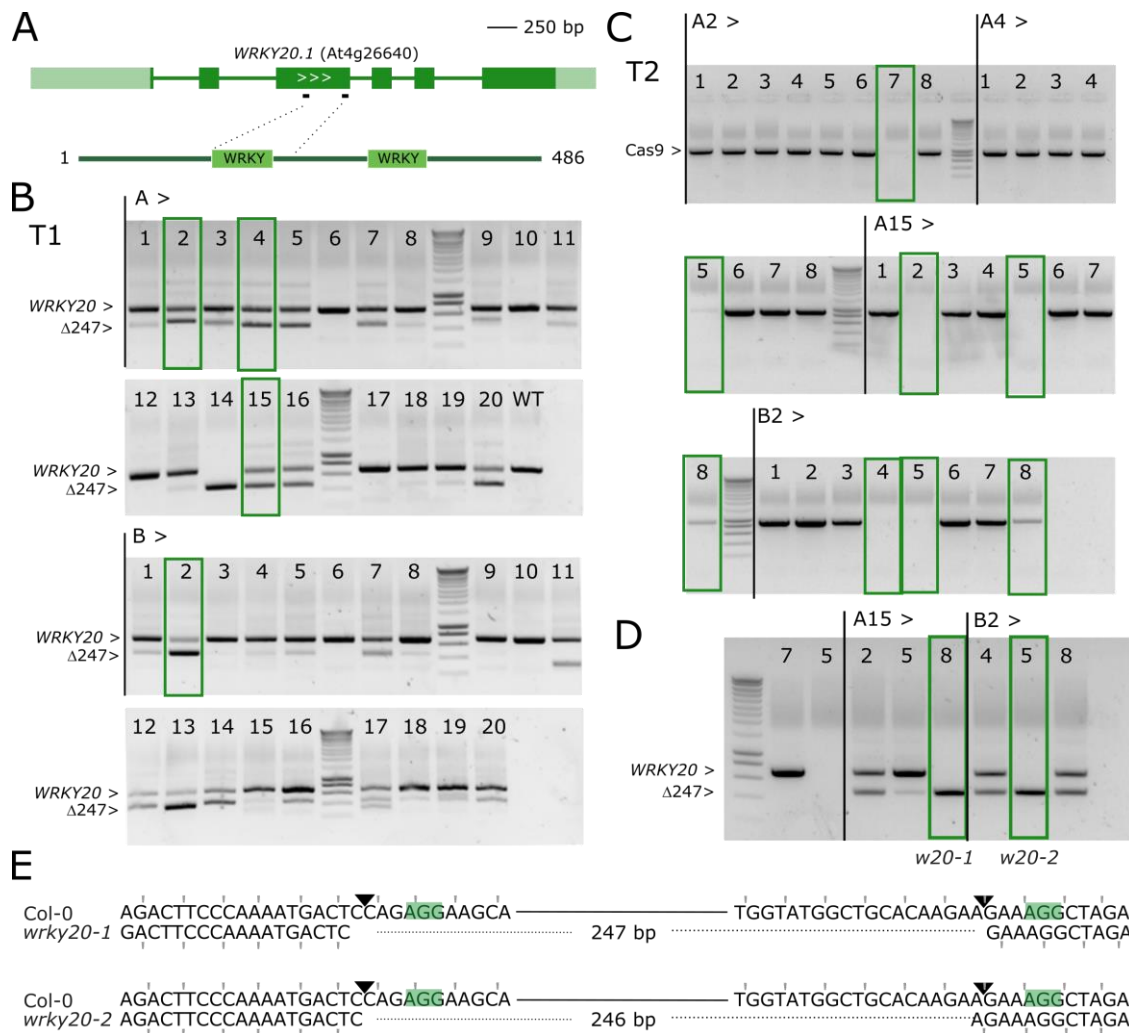

314

315 **Figure 5. WRKY20 dual sgRNA approach.** A, genomic structure of WRKY20 and location of the sgRNAs.  
 316 Dark green boxes designate exons; light green boxes, UTRs; solid lines, introns. B, PCR analysis of T1 lines.  
 317 Leaf genomic DNA of 2 batches (A and B) of 20 chimeric T1 plants was PCR amplified. The expected size of  
 318 the WT WRKY20 amplicon is indicated as well as the expected size of the deletion of 247 bp between Cas9 cut  
 319 sites. Four continued T1 lines having one T-DNA locus are highlighted with green boxes. C, Cas9 PCR for the  
 320 four continued lines in T2 generation. Putative Cas9 null-segregants are indicated with green boxes. D, Cas9  
 321 null-segregants were genotypes for WRKY20. The selected lines A15-8 (*wrky2-1 wrky20-1*) and B2-5 (*wrky2-1*  
 322 *wrky20-2*) are boxed. E, Sequence alignment of the simultaneously targeted loci for Col-0 and alleles *wrky20-1*  
 323 and *wrky20-2*. PAMs are highlighted, the Cas9 cut sites indicated with triangles. Deleted bases are indicated with  
 324 dashed lines. The reading frame is marked.

325 Next, we combined two sgRNAs targeting *VQ33* (VQ33-42 and VQ33-1) that displayed high  
 326 efficiency when tested individually (Figure 2). Working together, they are predicted to  
 327 remove a fragment of 459 bp, virtually removing the *VQ33* coding sequence (Figure S3A).  
 328 We proceeded with the same workflow as for *WRKY20* (Figure S3B-D). Out of four Cas9  
 329 null-segregants, two were homozygous for the expected gene fragment deletion, one  
 330 heterozygous and one WT. The allele *vq33-1* (plant 11-8), albeit it had an extra 1 bp  
 331 insertion, still led to a 458 bp out-of-frame deletion (Figure S3E).

332 In summary, we established a straightforward dual sgRNA approach to obtain plants  
 333 homozygous for relatively large deletions of gene fragments in the T2 generation in  
 334 *Arabidopsis thaliana*.  
 335

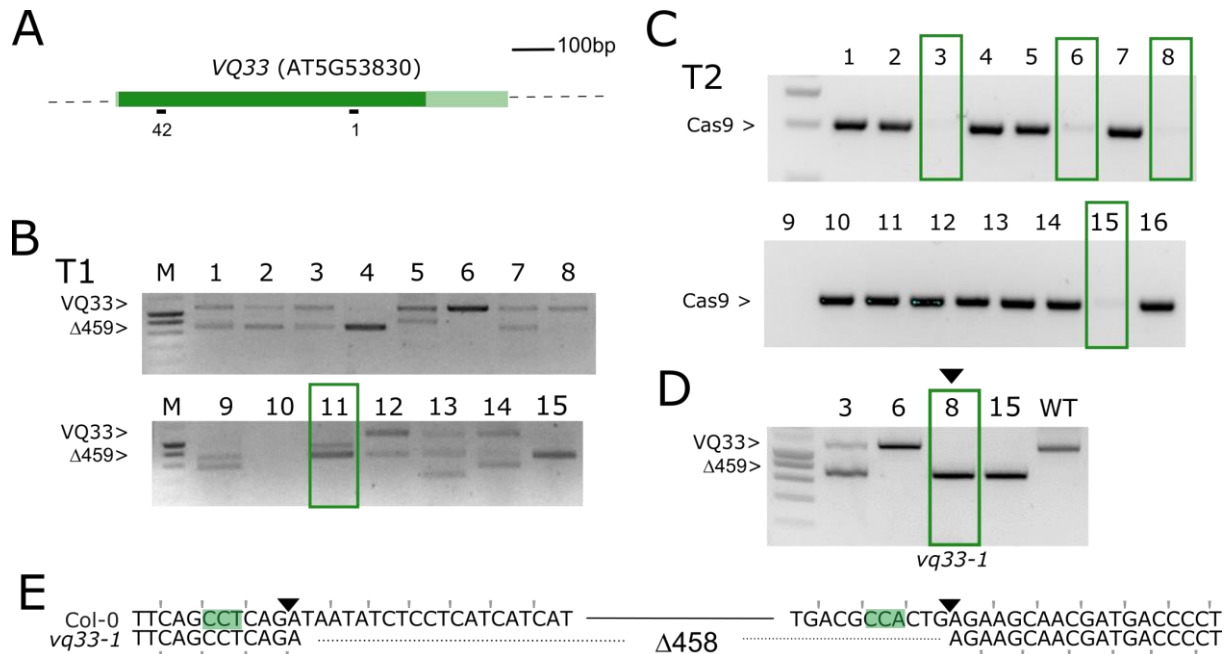

336 **Figure S3. *VQ33* dual sgRNA approach.** A, genomic structure of *VQ33* and location of the sgRNAs. Dark  
 337 green boxes designate exons; light green boxes, UTRs; solid lines, introns. B, PCR analysis of T1 lines. Leaf  
 338 genomic DNA of 16 chimeric T1 plants was PCR amplified. The expected size of the WT *VQ33* amplicon is  
 339 indicated as well as the expected size of the deletion of 459 bp between Cas9 cut sites. One T1 line having one  
 340 T-DNA locus that was continued is highlighted with a green box. C, Cas9 PCR for the continued line in T2  
 341 generation. Putative Cas9 null-segregants are indicated with green boxes. D, Cas9 null-segregants were  
 342 genotypes for *VQ33*. The selected plant 11-8 (*vq33-1*) is indicated with a triangle. E, Sequence alignment of the  
 343 simultaneously targeted loci for *Col-0* and *vq33-1*. PAMs are highlighted, the Cas9 cut sites indicated with  
 344 triangles. A 458 bp deletion was detected and is indicated with dashed lines. The reading frame is marked.  
 345

346  
 347

### 348 *grxs17-4* confirms the *grxs17-1* developmental phenotype

349 Next, we tried the dual sgRNA approach for *GRXS17*. We targeted the first sgRNA  
 350 (*GRXS17-133*) at the 5' end and the second sgRNA (*GRXS17-67*) at the 3' end of the gene to  
 351 remove 1953 bp and *GRXS17* almost entirely (Figure 6A). The *GRXS17* locus was amplified  
 352 for sixteen independent T1 plants using primers spanning the expected deletion. In  
 353 comparison with *VQ33* and *WRKY20*, only two plants clearly showed bands of the expected  
 354 size for the predicted deletion (Figure 6B). Two identified Cas9-null segregants (Figure 6C)  
 355 did not show the expected large deletion, but instead an indel was found at the first sgRNA

356 site in the first exon leading to a frameshift (Figure 6D). We re-named this allele *grxs17-4*.  
 357 Confirming our hypothesis that *grxs17-3* is indeed not a null allele, *grxs17-4* showed the leaf  
 358 phenotype of *grxs17-1* and *grxs17-2* (Iñigo *et al.*, 2016, Figure 6E). In conclusion, in the  
 359 event the dual sgRNA approach does not yield the designed gene fragment deletion, each  
 360 individual sgRNA may lead to useful alleles.

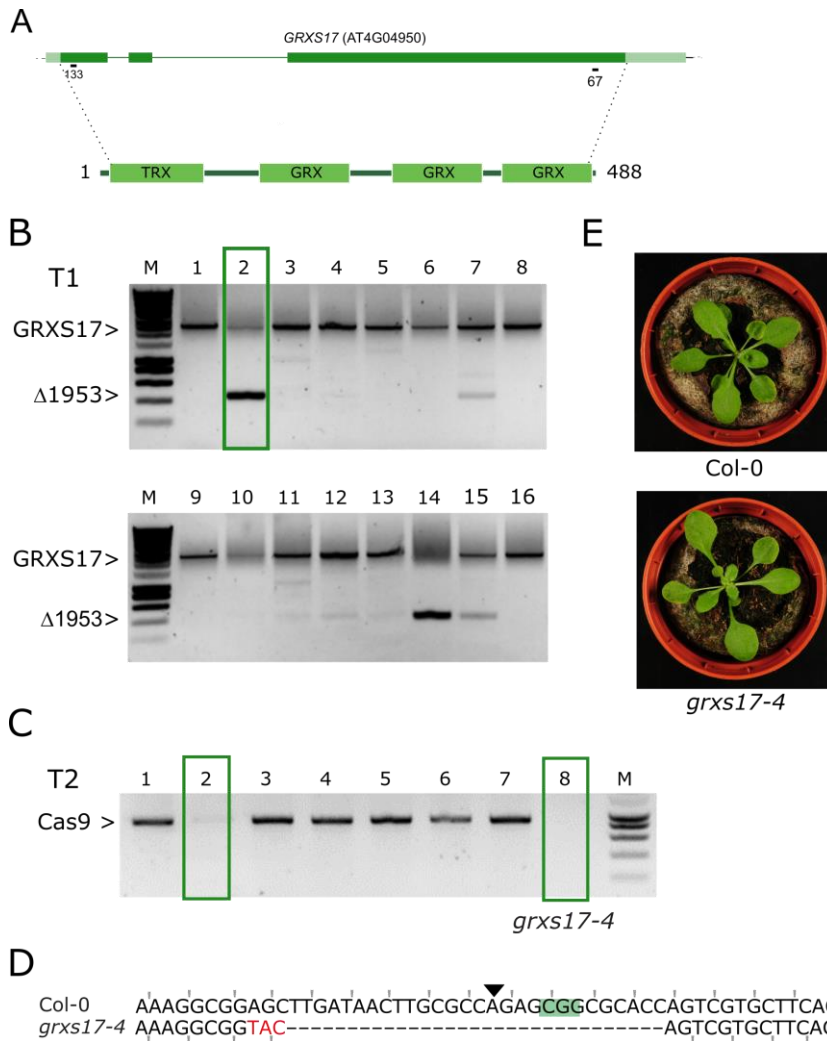

361

362 **Figure 6. A dual sgRNA approach for GRXS17.** A, genomic structure of *GRXS17* and location of the sgRNAs.  
 363 Dark green boxes designate exons; light green boxes, UTRs; solid lines, introns. B, PCR analysis of T1 lines.  
 364 Leaf genomic DNA of 16 chimeric T1 plants was PCR amplified. The expected size of the WT *GRXS17*  
 365 amplicon is indicated as well as the expected size of the deletion of 1953 bp between Cas9 cut sites. One T1 line  
 366 having one T-DNA locus that was continued is highlighted with a green box. C, Cas9 PCR for 8 T2 CRISPR  
 367 plants. Putative Cas9 null-segregants are indicated with green boxes. D, Sequence alignment of the sequence  
 368 surrounding the 5' sgRNA site for Col-0 and *grxs17-4* (Line 2, plant 8). PAM is highlighted, the Cas9 cut site  
 369 indicated with a triangle. Mutated bases are in red, deleted bases replaced by an en dash. The reading frame is  
 370 marked. E, representative rosette phenotypes of WT Col-0 (top) and *grxs17-4* (bottom).  
 371

## 372 **DISCUSSION**

### 373 ***Efficient CRISPR/Cas9 gene editing in Arabidopsis***

374 The CRISPR/Cas9 technology shows promise to speed up reverse genetics experiments in  
375 Arabidopsis. Here we demonstrate efficient recovery of Cas9-free Arabidopsis mutants using  
376 single and double sgRNA constructs in the T2 generation without phenotypic selection.  
377 Previous negative experiences with CRISPR/Cas9 have been attributed to the weak activity of  
378 the 35S promoter in germ-line cells (Wang *et al.*, 2015). The promoter used here, PcUBI, is  
379 expressed widely, but detailed expression in germ-line cells has not yet been studied  
380 (Kawalleck *et al.*, 1993). Other vector elements have been reported to play a role such as the  
381 vector backbone (Mao *et al.*, 2016), Cas9 coding sequence (Johnson *et al.*, 2015) and the  
382 terminator sequence (Wang *et al.*, 2015). We did not observe any obvious differences using  
383 either *nptII* or *bar* as selection markers. Systematic analysis of all vector parameters is now  
384 achievable using modular cloning systems, which might allow identification of the best  
385 combinations (Vazquez-Vilar *et al.*, 2016).

386 We consider the workflow presented here as already an acceptable workload comparable to  
387 the routine generation of overexpression lines. Nonetheless, several improvements have  
388 recently been developed. For example, a fluorescent marker for identification of transgenic T1  
389 seeds has been reported (Tsutsui and Higashiyama, 2016) and also recently cloned into pDE-  
390 Cas9 for CRISPR/Cas9 in *Camelina sativa* (Morineau *et al.*, 2016). When Cas9 is driven with  
391 a promoter active in the egg cell, non-chimeric homozygous or bi-allelic mutants can already  
392 be retrieved in the T1 generation, although Cas9 null-segregants also only appear in T2  
393 (Wang *et al.*, 2015, Yan *et al.*, 2016, Mao *et al.*, 2016, Eid *et al.*, 2017).

394

### 395 ***TIDE as a useful tool to study mutations***

396 Efficiency of CRISPR/Cas9 also clearly depends on the choice of sgRNA, although all  
397 sgRNAs tested in this study were active to some degree. Several models have been  
398 constructed to predict on-target editing efficiency based on the sgRNA primary sequence and  
399 on-target efficiency data from metazoans (Doench *et al.*, 2016, Moreno-Mateos *et al.*, 2015).  
400 Due to the lack of sufficient data, no plant-specific design models are currently available. As  
401 previously reported (Ordon *et al.*, 2016), we did not observe any obvious correlation between  
402 these predictions and our observed efficiencies in Arabidopsis. It is unclear why this is the  
403 case for a heterologous system such as CRISPR/Cas9. Therefore - for the time being - we

404 continue to take into account metazoan models when designing plant sgRNAs. It has been  
405 suggested to pre-screen sgRNAs in protoplasts (Li *et al.*, 2014). Given the ease of Arabidopsis  
406 transformation via floral dip, we conclude from this study that designing several sgRNAs for  
407 the same target and testing somatic mutations in T1 might be an equally rapid method to  
408 identify efficient sgRNAs, while simultaneously obtaining the desired mutants.  
409 Several methods have been used to study CRISPR/Cas9-induced mutations, most importantly  
410 cleaved amplified polymorphic sequence (CAPS), T7 endonuclease, next-generation  
411 sequencing and high-resolution melting curve analysis (Denbow *et al.*, 2017). The method  
412 used here, TIDE (Brinkman *et al.*, 2015), has several advantages. First, it does not require a  
413 restriction enzyme site overlapping the Cas9 cut site as in CAPS. Secondly, it allows the  
414 starting genomic DNA to be relatively impure allowing for more economic DNA extraction  
415 methods compared to T7-based assays. Thirdly, it uses standard capillary Sanger sequencing  
416 that can be readily performed for even a single sample. Fourthly, it can provide an insight in  
417 the indel spectrum of mosaics similar to next-generation sequencing as well as providing an  
418 idea of overall efficiencies. These TIDE efficiencies are likely an underestimation. For  
419 example, TIDE is unable to detect rare SNVs as observed for *glb3-4*. The *grxs17-3* allele also  
420 revealed that mutations can be more complex than predicted by TIDE: a predicted 8 bp  
421 deletion was actually a 12 bp deletion combined with a 4 bp insertion.

422

### 423 ***Know your target gene***

424 The absence of the typical *grxs17* phenotype in the CRISPR allele *grxs17-3* is an example of  
425 how it is important to study independent alleles made with either different sgRNAs or with  
426 other methods when interpreting phenotypes of CRISPR/Cas9-generated alleles as knock-out  
427 effects. When sufficient information is available, especially on alternative transcripts and  
428 protein domain structures, sgRNA target sites can be chosen to maximize the chance of a  
429 complete knock-out as a result of an indel mutation at that site. Additionally, one may disrupt  
430 the gene more dramatically by removing a larger gene fragment using a dual sgRNA  
431 approach. The use of CRISPR/Cas9 for gene deletion has been pioneered in mammalian  
432 systems (Chen *et al.*, 2014, Zhou *et al.*, 2014, Ran *et al.*, 2013, Canver *et al.*, 2014). In  
433 Arabidopsis, a dual sgRNA approach for gene deletion was reported by Zhao *et al.*, 2016 and  
434 Ordon *et al.* 2017. In Zhao *et al.*, homozygous deletion mutants were obtained for the  
435 *AtMIR827a* and *AtMIR169a* loci in the T2 or T3 generation, respectively. The size of the

436 deletion and efficiency seem to correlate inversely in mammalian cells (Canver *et al.*, 2014)  
437 and plants (Ordon *et al.*, 2016). Similarly, when attempting to cut out a 1953 kb fragment in  
438 *GRXS17*, it failed to be inherited, while clearly being present in T1 somatic cells. In contrast,  
439 247 bp and 459 bp fragment deletions were easily obtainable for *WRKY20* and *VQ33*  
440 respectively. Therefore, while deleting whole genes might be tempting, it is more practical  
441 targeting genes with two sgRNAs in the 5' coding sequence. This has the additional  
442 advantage, that when one sgRNA has a low efficiency, the construct will still yield potential  
443 knock-out mutations at the other sgRNA site. It has been proposed from work in tomato  
444 protoplasts that in most cases when a single sgRNA is used, NHEJ results in perfect repair  
445 and therefore using two sgRNAs could be more efficient to obtain mutants (Čermák *et al.*,  
446 2017). Finally, the double-sgRNA approach has an advantage of easy visual genotyping of  
447 mutants based on amplicon lengths.

#### 448 ***New alleles for GRXS17***

449 *GRXS17* encodes the Arabidopsis ortholog of human *GRX3/PICOT* and yeast *Grx3/Grx4*.  
450 Although a role for *GRXS17* in iron-sulfur cluster assembly is conserved in all of these  
451 organisms, plant-specific functions for *GRXS17* are apparent (Iñigo *et al.*, 2016, Kneustig *et*  
452 *al.*, 2016). Interestingly, At*GRXS17*, Hs*GRX3* and Sc*Grx3/4* differ in the number of GRX  
453 domains that are C-terminal of the TRX domain with three, two and one domain present,  
454 respectively. The new *grxs17-3* allele presented here might have residual expression of a  
455 truncated *GRXS17* with only one GRX domain — similar to Sc*Grx3/4* — and could therefore  
456 be helpful in studying plant-specific *GRXS17* roles.

457

## 458 MATERIALS AND METHODS

### 459 *Design of sgRNAs*

460 In general, sgRNAs were selected for specificity using CRISPR-P ([http://cbi.hzau.edu.cn/cgi-](http://cbi.hzau.edu.cn/cgi-bin/CRISPR)  
461 [bin/CRISPR](http://cbi.hzau.edu.cn/cgi-bin/CRISPR), Lei *et al.*, 2014), taking into account predicted on-target efficiencies using  
462 sgRNAscorer (<https://crispr.med.harvard.edu/sgRNAScorer/>, Chari *et al.*, 2015). An updated  
463 overview of estimated sgRNA parameters by CRISP-OR (<http://crispor.tefor.net/>, Haeussler *et*  
464 *al.*, 2016) can be found in Table 1.

465

### 466 *Cloning of CRISPR/Cas9 constructs*

467 CRISPR/Cas9 constructs were cloned as previously described (Figure S1, Fauser *et al.*, 2014,  
468 Ritter *et al.*, 2017). Briefly, for each guide sequence, two complementary oligos with 4bp  
469 overhangs (Supplementary Table S1) were annealed and inserted via a cut-ligation reaction  
470 with BbsI (Thermo) and T4 DNA ligase (Thermo) in a Gateway ENTRY sgRNA shuttle  
471 vector. This is either pEN-C1.1 (Fauser *et al.*, 2014) for single sgRNA constructs, or pMR217  
472 (L1-R5) and pMR218 (L5-L2) (Ritter *et al.*, 2017) for the dual sgRNA approach. The 5'  
473 overhang already contains the G initiation nucleotide of the AtU6-26 polIII promoter. Next,  
474 using a Gateway LR reaction (ThermoFisher), one or two sgRNA modules were then  
475 combined with pDE-Cas9 (Basta, Fauser *et al.*, 2014) or pDE-Cas9Km (pMR278, Ritter *et al.*,  
476 2017) to yield the final expression clone.

477

### 478 *Plant transformation*

479 Expression clones were introduced in the Agrobacterium strain C58C1 (pMP90) using  
480 electroporation, which was used to transform Arabidopsis using the floral dip method (Clough  
481 and Bent, 1998).

482

### 483 *Plant Material and Growth Conditions*

484 *Arabidopsis thaliana* Col-0 were grown at 21°C under long day (16-h light/8-h dark)  
485 conditions. Rapid selection of seeds with kanamycin and phosphinothricin (BASTA™)  
486 selection was performed as described (Harrison *et al.*, 2006).

487



## 488 ***Selection of CRISPR/Cas9 mutants***

489 A scheme of our strategy is given as Figure S4. Typically, 16 kanamycin- or BASTA-resistant  
490 T1 plants are selected *in vitro* and transferred to a growth room. After 14 days, a single leaf is  
491 harvested and genomic DNA prepared using Edwards buffer (Edwards *et al.*, 1991). Next, 5  
492 µl template gDNA was used as a template in a standard 20 µl volume PCR reaction using  
493 GoTaq® (Promega) with the supplied Green GoTaq® Reaction Buffer. For single sgRNA  
494 constructs, the amplicon was treated with ExoSAP-IT™ (Thermo) and sequenced by standard  
495 capillary sequencing at the VIB Genomics Core Facility (<https://corefacilities.vib.be/gsf>).  
496 Quantitative sequence trace data was decomposed using TIDE (<https://tide.nki.nl/>) using  
497 standard settings, except for the indel size range, which was set on the maximum (50).  
498 Primers for TIDE were designed using Primer3 (<http://bioinfo.ut.ee/primer3-0.4.0/>) using  
499 standard parameters. Approximately 700 bp asymmetrically surrounding the Cas9 cut site was  
500 amplified. The amplification primer at 200 bp from the site was used for sequencing.  
501 For each independent T1 line, approximately 64 T2 seeds were selected on either BASTA or  
502 kanamycin. Resistant versus sensitive seedlings were analyzed using a chi-squared test and  
503 lines presumably having a single T-DNA locus continued. Typically, 15 seedlings of the  
504 most promising line (highest T1 efficiency, expected segregation) were grown on non-  
505 selective media and genotyped for the presence of the T-DNA locus using Cas9-specific  
506 primers (Table S1). Cas9 null-segregants are then analyzed for modifications at the locus of  
507 interest. The most promising plants are then propagate to T3, in which absence of Cas9 and  
508 presence of the mutation/deletion is confirmed by PCR and sequencing.

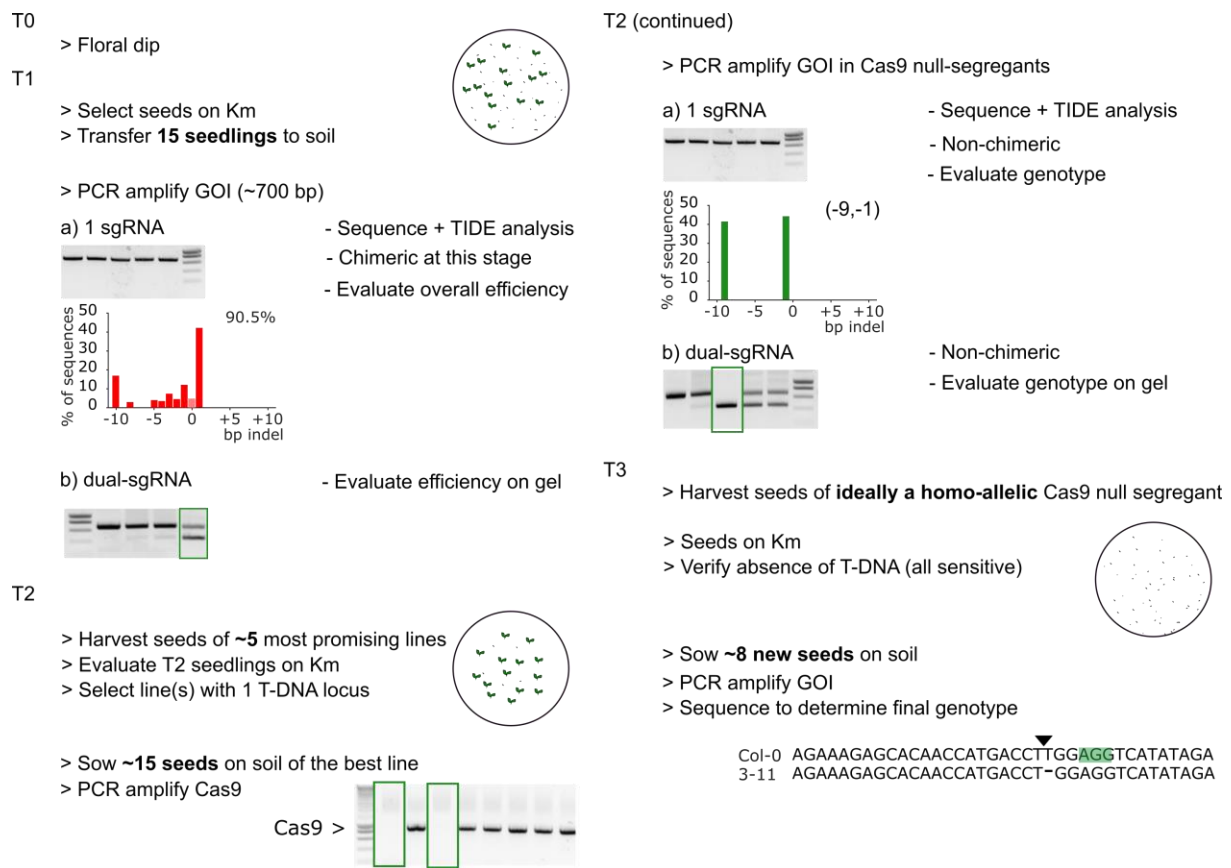

509

510 **Figure S4. CRISPR workflow.** Schematic overview of the selection of Cas9 null-segregants with bi-allelic  
 511 mutations in the T2 generation.

512

### 513 ***Amplicon subcloning***

514 For confirmation of TIDE spectra, the PCR amplicon was cut from gel, purified using  
 515 GeneJET PCR purification kit (Thermo Scientific) and cloned into pJET1.2 using the  
 516 CloneJET PCR cloning kit (Thermo Scientific). Individual clones were sequenced using  
 517 capillary electrophoresis.

518

### 519 ***RT-qPCR***

520 Seedlings were grown in the same conditions as in Iñigo *et al.*, 2016. Seedlings were frozen in  
 521 liquid nitrogen and total RNA was extracted using RNeasy plant mini kit (Qiagen) and  
 522 DNase I (Promega) treatment. Next, 1 µg of RNA was used for cDNA synthesis using iScript  
 523 kit (Bio-Rad). qRT-PCR was performed on a LightCycler 480 system (Roche) using the Fast  
 524 Start SYBR Green I PCR mix (Roche) with three biological repeats and three technical  
 525 repeats. Data were analyzed using the second derivative maximum method and relative

526 expression levels were determined using the comparative cycle threshold method. Primer  
527 sequences are provided in Supplemental Table S1.

528

## 529 **ACCESSION NUMBERS**

530 Accession numbers of the genes used in this study: *GRXS17*, AT4G04950; *VQ19/MVQ4*,  
531 AT3G15300; *VQ33/MVQ3*, AT5G53830; *WRKY20*, AT4G26640; *WRKY2*, AT5G56270;  
532 *JAM2/bHLH13*, AT1G01260; *GLB3*, AT4G32690. T-DNA lines used: *grxs17-1*,  
533 SALK\_021301; *wrky2-1*, SALK\_020399.

534

## 535 **SUPPLEMENTAL DATA**

536 Figure S1. Cloning procedures and vector maps.

537 Figure S2. Comparison of TIDE spectra between leaves of the same T1 plant.

538 Figure S3. *VQ33* dual sgRNA approach.

539 Figure S4. CRISPR workflow.

540 Table S1. Oligonucleotides used in this study.

541

## 542 **FUNDING**

543 This work was supported by the Research Foundation Flanders through the projects  
544 G005212N and G005312N and a postdoctoral fellowship to L.P.; the Belgian Science Policy  
545 Organization for a postdoctoral fellowship to S.I. and the Agency for Innovation by Science  
546 and Technology in Flanders for a predoctoral fellowship to J.G; the National Science  
547 Foundation for M.R.'s contribution to this work by grant # 1636397.

548

## 549 **ACKNOWLEDGMENTS**

550 We thank Carina Braeckman for Arabidopsis floral dip transformations, Karel Spruyt for  
551 photography, Wilson Ardiles Diaz for help with sequencing, Annick Bleys for help in  
552 preparing the manuscript, Holger Puchta for providing the pDE-Cas9 vector and Thomas  
553 Laux for providing *wrky2-1* seeds. We thank Lieven De Veylder, Thomas Jacobs and Ward  
554 Decaestecker for their helpful comments on the manuscript.

555

## 556 **AUTHOR CONTRIBUTIONS**

557 L.P., A.B. and A.G. designed the research; L.P., R.D.C, S.I., J.G., C.W. and M.R. performed  
558 research; L.P. wrote the paper with help from all authors.

559

## 560 **REFERENCES**

561

562 Baltes NJ, Voytas DF (2015) Enabling plant synthetic biology through genome engineering. *Trends*  
563 *Biotechnol* 33: 120–131

564 Bechtold N, Jaudeau B, Jolivet S, Maba B, Vezon D, Voisin R, Pelletier G (2000) The maternal  
565 chromosome set is the target of the T-DNA in the in planta transformation of *Arabidopsis thaliana*.  
566 *Genetics* 155: 1875–87

567 Black S, Kashkina E, Kent T, Pomerantz R (2016) DNA Polymerase  $\theta$ : A Unique Multifunctional End-  
568 Joining Machine. *Genes (Basel)* 7: 67

569 Brinkman EK, Chen T, Amendola M, van Steensel B (2014) Easy quantitative assessment of genome  
570 editing by sequence trace decomposition. *Nucleic Acids Res* 42: e168

571 Canver MC, Bauer DE, Dass A, Yien YY, Chung J, Masuda T, Maeda T, Paw BH, Orkin SH (2014)  
572 Characterization of genomic deletion efficiency mediated by clustered regularly interspaced  
573 palindromic repeats (CRISPR)/cas9 nuclease system in mammalian cells. *J Biol Chem* 289: 21312–  
574 21324

575 Čermák T, Curtin SJ, Gil-Humanes J, Čegan R, Kono TJY, Konečná E, Belanto JJ, Starker CG, Mathre JW,  
576 Greenstein RL, et al (2017) A Multipurpose Toolkit to Enable Advanced Genome Engineering in  
577 Plants. *Plant Cell* 29: 1196–1217

578 Chari R, Mali P, Moosburner M, Church GM (2015) Unraveling CRISPR-Cas9 genome engineering  
579 parameters via a library-on-library approach. *Nat Methods* 12: 823–6

580 Chen X, Xu F, Zhu C, Ji J, Zhou X, Feng X, Guang S (2014) Dual sgRNA-directed gene knockout using  
581 CRISPR/Cas9 technology in *Caenorhabditis elegans*. *Sci Rep* 4: 7581

582 Cheng N-H, Liu J-Z, Liu X, Wu Q, Thompson SM, Lin J, Chang J, Whitham S a., Park S, Cohen JD, et al  
583 (2011) *Arabidopsis* Monothiol Glutaredoxin, AtGRXS17, Is Critical for Temperature-dependent  
584 Postembryonic Growth and Development via Modulating Auxin Response. *J Biol Chem* 286: 20398–  
585 20406

586 Cho SW, Kim S, Kim Y, Kweon J, Kim HS, Bae S, Kim J (2014) Analysis of off-target effects of  
587 CRISPR/Cas-derived RNA-guided endonucleases and nickases. *Genome Res* 24: 132–41

588 Clough SJ, Bent AF (1998) Floral dip: a simplified method for *Agrobacterium*-mediated transformation  
589 of *Arabidopsis thaliana*. *Plant J* 16: 735–43

590 Couturier J, Przybyla-Toscano J, Roret T, Didierjean C, Rouhier N (2015) The roles of glutaredoxins  
591 ligating Fe–S clusters: Sensing, transfer or repair functions? *Biochim Biophys Acta - Mol Cell Res*  
592 1853: 1513–1527

593 Denbow CJ, Lapins S, Dietz N, Scherer R, Nimchuk ZL, Okumoto S (2017) Gateway-Compatible CRISPR-  
594 Cas9 Vectors and a Rapid Detection by High-Resolution Melting Curve Analysis. *Front Plant Sci*. doi:  
595 10.3389/fpls.2017.01171

- 596 Doench JG, Hartenian E, Graham DB, Tothova Z, Hegde M, Smith I, Sullender M, Ebert BL, Xavier RJ,  
597 Root DE (2014) Rational design of highly active sgRNAs for CRISPR-Cas9-mediated gene inactivation.  
598 *Nat Biotechnol* 32: 1262–7
- 599 Edwards K, Johnstone C, Thompson C (1991) A simple and rapid method for the preparation of plant  
600 genomic DNA for PCR analysis. *Nucleic Acids Res* 19: 1349
- 601 Eid A, Ali Z, Mahfouz MM (2016) High efficiency of targeted mutagenesis in arabidopsis via meiotic  
602 promoter-driven expression of Cas9 endonuclease. *Plant Cell Rep* 35: 1555–1558
- 603 Fatscher T, Boehm V, Weiche B, Gehring NH (2014) The interaction of cytoplasmic poly(A)-binding  
604 protein with eukaryotic initiation factor 4G suppresses nonsense-mediated mRNA decay. *RNA* 20:  
605 1579–1592
- 606 Fauser F, Schiml S, Puchta H (2014) Both CRISPR/Cas-based nucleases and nickases can be used  
607 efficiently for genome engineering in *Arabidopsis thaliana*. *Plant J* 79: 348–359
- 608 Feng Z, Mao Y, Xu N, Zhang B, Wei P, Yang D-L, Wang Z, Zhang Z, Zheng R, Yang L, et al (2014)  
609 Multigeneration analysis reveals the inheritance, specificity, and patterns of CRISPR/Cas-induced  
610 gene modifications in *Arabidopsis*. *Proc Natl Acad Sci U S A* 111: 4632–7
- 611 Feng Z, Zhang B, Ding W, Liu X, Yang D-L, Wei P, Cao F, Zhu S, Zhang F, Mao Y, et al (2013) Efficient  
612 genome editing in plants using a CRISPR/Cas system. *Cell Res* 23: 1229–1232
- 613 Fernández-Calvo P, Chini A, Fernández-Barbero G, Chico J-M, Gimenez-Ibanez S, Geerinck J, Eeckhout  
614 D, Schweizer F, Godoy M, Franco-Zorrilla JM, et al (2011) The *Arabidopsis* bHLH transcription factors  
615 MYC3 and MYC4 are targets of JAZ repressors and act additively with MYC2 in the activation of  
616 jasmonate responses. *Plant Cell* 23: 701–15
- 617 Fu Y, Sander JD, Reyon D, Cascio VM, Joung JK (2014) Improving CRISPR-Cas nuclease specificity using  
618 truncated guide RNAs. *Nat Biotechnol* 32: 279–84
- 619 Gao Y, Zhang Y, Zhang D, Dai X, Estelle M, Zhao Y (2015) Auxin binding protein 1 (ABP1) is not  
620 required for either auxin signaling or *Arabidopsis* development. *Proc Natl Acad Sci U S A* 112: 2275–  
621 80
- 622 Guseman JM, Webb K, Srinivasan C, Dardick C (2017) DRO1 influences root system architecture in  
623 *Arabidopsis* and *Prunus* species. *Plant J* 89: 1093–1105
- 624 Haeussler M, Schönig K, Eckert H, Eschstruth A, Mianné J, Renaud J-B, Schneider-Maunoury S,  
625 Shkumatava A, Teboul L, Kent J, et al (2016) Evaluation of off-target and on-target scoring algorithms  
626 and integration into the guide RNA selection tool CRISPOR. *Genome Biol* 17: 148
- 627 Harrison SJ, Mott EK, Parsley K, Aspinall S, Gray JC, Cottage A (2006) A rapid and robust method of  
628 identifying transformed *Arabidopsis thaliana* seedlings following floral dip transformation. *Plant*  
629 *Methods* 2: 19
- 630 Iñigo S, Durand AN, Ritter A, Le Gall S, Termathe M, Klassen R, Tohge T, De Coninck B, Van Leene J, De  
631 Clercq R, et al (2016) Glutaredoxin GRXS17 Associates with the Cytosolic Iron-Sulfur Cluster Assembly  
632 Pathway. *Plant Physiol* 172: 858–873
- 633 Jinek M, Chylinski K, Fonfara I, Hauer M, Doudna JA, Charpentier E (2012) A programmable dual-RNA-  
634 guided DNA endonuclease in adaptive bacterial immunity. *Science* 337: 816–21
- 635 Jing Y, Lin R (2015) The VQ Motif-Containing Protein Family of Plant-Specific Transcriptional  
636 Regulators. *Plant Physiol* 169: 371–378
- 637 Johnson RA, Gurevich V, Filler S, Samach A, Levy AA (2015) Comparative assessments of CRISPR-Cas  
638 nucleases' cleavage efficiency in planta. *Plant Mol Biol* 87: 143–156

- 639 Kawalleck P, Somssich IE, Feldbrügge M, Hahlbrock K, Weisshaar B (1993) Polyubiquitin gene  
640 expression and structural properties of the ubi4-2 gene in *Petroselinum crispum*. *Plant Mol Biol* 21:  
641 673–84
- 642 Knoll A, Fauser F, Puchta H (2014) DNA recombination in somatic plant cells: mechanisms and  
643 evolutionary consequences. *Chromosom Res* 22: 191–201
- 644 Knesting J, Riondet C, Maria C, Kruse I, Bécuwe N, König N, Berndt C, Tourrette S, Guillemint-  
645 Montoya J, Herrero E, et al (2015) Arabidopsis Glutaredoxin S17 and Its Partner, the Nuclear Factor Y  
646 Subunit C11/Negative Cofactor 2 $\alpha$ , Contribute to Maintenance of the Shoot Apical Meristem under  
647 Long-Day Photoperiod. *Plant Physiol* 167: 1643–1658
- 648 Lei Y, Lu L, Liu HY, Li S, Xing F, Chen LL (2014) CRISPR-P: A web tool for synthetic single-guide RNA  
649 design of CRISPR-system in plants. *Mol Plant* 7: 1494–1496
- 650 Li J-F, Zhang D, Sheen J (2014) Cas9-based genome editing in Arabidopsis and tobacco. *Methods*  
651 *Enzymol* 546: 459–72
- 652 Li P, Li Y-J, Zhang F-J, Zhang G-Z, Jiang X-Y, Yu H-M, Hou B-K (2017) The Arabidopsis UDP-  
653 glycosyltransferases UGT79B2 and UGT79B3, contribute to cold, salt and drought stress tolerance via  
654 modulating anthocyanin accumulation. *Plant J* 89: 85–103
- 655 Lu K-J, De Rybel B, van Mourik H, Weijers D (2017) Regulation of intercellular TARGET OF  
656 MONOPTEROS 7 protein transport in the Arabidopsis root. *bioRxiv*
- 657 Ma X, Zhang Q, Zhu Q, Liu W, Chen Y, Qiu R, Wang B, Yang Z, Li H, Lin Y, et al (2015) A Robust  
658 CRISPR/Cas9 System for Convenient, High-Efficiency Multiplex Genome Editing in Monocot and Dicot  
659 Plants. *Mol Plant* 8: 1274–1284
- 660 Mao Y, Zhang H, Xu N, Zhang B, Gou F, Zhu JK (2013) Application of the CRISPR-Cas system for  
661 efficient genome engineering in plants. *Mol Plant* 6: 2008–2011
- 662 Mao Y, Zhang Z, Feng Z, Wei P, Zhang H, Botella JR, Zhu JK (2016) Development of germ-line-specific  
663 CRISPR-Cas9 systems to improve the production of heritable gene modifications in Arabidopsis. *Plant*  
664 *Biotechnol J* 14: 519–532
- 665 Moreno-Mateos MA, Vejnár CE, Beaudoin J, Fernandez JP, Mis EK, Khokha MK, Giraldez AJ (2015)  
666 CRISPRscan: designing highly efficient sgRNAs for CRISPR-Cas9 targeting in vivo. *Nat Methods* 12:  
667 982–8
- 668 Morineau C, Bellec Y, Tellier F, Gissot L, Kelemen Z, Nogué F, Faure J-D (2017) Selective gene dosage  
669 by CRISPR-Cas9 genome editing in hexaploid *Camelina sativa*. *Plant Biotechnol J* 15: 729–739
- 670 Nagels Durand A, Iñigo S, Ritter A, Iniesto E, De Clercq R, Staes A, Van Leene J, Rubio V, Gevaert K, De  
671 Jaeger G, et al (2016) The Arabidopsis Iron–Sulfur Protein GRXS17 is a Target of the Ubiquitin E3  
672 Ligases RGLG3 and RGLG4. *Plant Cell Physiol* 57: 1801–1813
- 673 Ning YQ, Ma ZY, Huang HW, Mo H, Zhao TT, Li L, Cai T, Chen S, Ma L, He XJ (2015) Two novel NAC  
674 transcription factors regulate gene expression and flowering time by associating with the histone  
675 demethylase JMJ14. *Nucleic Acids Res* 43: 1469–1484
- 676 Ordon J, Gantner J, Kemna J, Schwalgun L, Reschke M, Streubel J, Boch J, Stüttmann J (2017)  
677 Generation of chromosomal deletions in dicotyledonous plants employing a user-friendly genome  
678 editing toolkit. *Plant J* 89: 155–168
- 679 Osakabe Y, Watanabe T, Sugano SS, Ueta R, Ishihara R, Shinozaki K, Osakabe K (2016) Optimization of  
680 CRISPR/Cas9 genome editing to modify abiotic stress responses in plants. *Sci Rep* 6: 26685

- 681 Peterson BA, Haak DC, Nishimura MT, Teixeira PJPL, James SR, Dangl JL, Nimchuk ZL (2016) Genome-  
682 Wide Assessment of Efficiency and Specificity in CRISPR/Cas9 Mediated Multiple Site Targeting in  
683 Arabidopsis. PLoS One 11: e0162169
- 684 Popp MW, Maquat LE (2016) Leveraging rules of nonsense-mediated mRNA decay for genome  
685 engineering and personalized medicine. Cell 165: 1319–1332
- 686 Ran FA, Hsu PPD, Wright J, Agarwala V, Scott D a, Zhang F (2013) Genome engineering using the  
687 CRISPR-Cas9 system. Nat Protoc 8: 2281–308
- 688 Ritter A, Iñigo S, Fernández-Calvo P, Heyndrickx KS, Dhondt S, Shi H, De Milde L, Vanden Bossche R,  
689 De Clercq R, Eeckhout D, et al (2017) The transcriptional repressor complex FRS7-FRS12 regulates  
690 flowering time and growth in Arabidopsis. Nat Commun 8: 15235
- 691 Sang-Tae Kim, Jeongbin Park, Daesik Kim, Kyoungmi Kim, Sangsu Bae, Matthias Schlesner J-SK (2017)  
692 Questioning unexpected CRISPR off-target mutations in vivo. bioRxiv. doi: [://doi.org/10.1101/157925](https://doi.org/10.1101/157925)
- 693 Sasaki-Sekimoto Y, Jikumaru Y, Obayashi T, Saito H, Masuda S, Kamiya Y, Ohta H, Shirasu K (2013)  
694 Basic helix-loop-helix transcription factors JASMONATE-ASSOCIATED MYC2-LIKE1 (JAM1), JAM2, and  
695 JAM3 are negative regulators of jasmonate responses in Arabidopsis. Plant Physiol 163: 291–304
- 696 Tsutsui H, Higashiyama T (2017) pKAMA-ITACHI Vectors for Highly Efficient CRISPR/Cas9-Mediated  
697 Gene Knockout in Arabidopsis thaliana. Plant Cell Physiol 58: 46–56
- 698 Ueda M, Zhang Z, Laux T (2011) Transcriptional Activation of Arabidopsis Axis Patterning Genes  
699 WOX8/9 Links Zygote Polarity to Embryo Development. Dev Cell 20: 264–270
- 700 Vazquez-Vilar M, Bernabé-Orts JM, Fernandez-Del-Carmen A, Ziarsolo P, Blanca J, Granell A, Orzaez D  
701 (2016) A modular toolbox for gRNA-Cas9 genome engineering in plants based on the GoldenBraid  
702 standard. Plant Methods 12: 10
- 703 Wang Z-P, Xing H-L, Dong L, Zhang H-Y, Han C-Y, Wang X-C, Chen Q-J (2015) Egg cell-specific  
704 promoter-controlled CRISPR/Cas9 efficiently generates homozygous mutants for multiple target  
705 genes in Arabidopsis in a single generation. Genome Biol 16: 144
- 706 Xin X-F, Nomura K, Aung K, Velásquez AC, Yao J, Boutrot F, Chang JH, Zipfel C, He SY (2016) Bacteria  
707 establish an aqueous living space in plants crucial for virulence. Nature 539: 524–529
- 708 Yan L, Wei S, Wu Y, Hu R, Li H, Yang W, Xie Q (2015) High-Efficiency Genome Editing in Arabidopsis  
709 Using YAO Promoter-Driven CRISPR/Cas9 System. Mol Plant 8: 1820–1823
- 710 Zhang Z, Mao Y, Ha S, Liu W, Botella JR, Zhu JK (2016) A multiplex CRISPR/Cas9 platform for fast and  
711 efficient editing of multiple genes in Arabidopsis. Plant Cell Rep 35: 1519–1533
- 712 Zhou J, Wang J, Shen B, Chen L, Su Y, Yang J, Zhang W, Tian X, Huang X (2014) Dual sgRNAs facilitate  
713 CRISPR/Cas9-mediated mouse genome targeting. FEBS J 281: 1717–1725
- 714
- 715
-
